# Supplementary material
Source: PubMed Central journal article supplement (PMC10028617)
Supplement: NIHMS1824383-supplement-supinfo.pdf [file NIHMS1824383-supplement-supinfo.pdf]

## Supplementary Text S1

### Open-ended questions asked of amyloid PET scan recipients

1. According to the doctor, what do the results of the amyloid PET scan mean?
2. Tell me about how you think the results influence your plans for the future.
3. How do you hope that the amyloid PET scan results will affect your care and treatment?
4. Tell me in your own words the steps you took to get the diagnosis and how difficult it was for you to get the diagnosis.  
(PROBE: Some people see multiple providers, or take a long time and/or money.)

### Open-ended questions asked of care partners

1. Tell me a little bit about what made you aware that something had changed with <PATIENT>'s memory.

Thank you for sharing that. Now I am going to ask some questions about the amyloid PET scan.

2. According to the doctor, what do the results of the amyloid PET scan mean?
3. Tell me about how the results influence your plans for <PATIENT>'s future.
4. How do you hope that the amyloid PET scan results will affect <PATIENT>'s care and treatment?
5. Tell me in your own words the steps you and <PATIENT> took to get the diagnosis and how difficult it was for <PATIENT> you to get the diagnosis?  
(PROBE: Some people see multiple providers, or take a long time and/or money)
